# Supplementary material for: Linking Spatial–Temporal Changes of Vegetation Cover with Hydroclimatological Variables in Terrestrial Environments with a Focus on the Lake Urmia Basin
Source: MDPI journal article supplement (doi:10.3390/land11010115), 2022-01-11
Supplement: s1 [file s1]

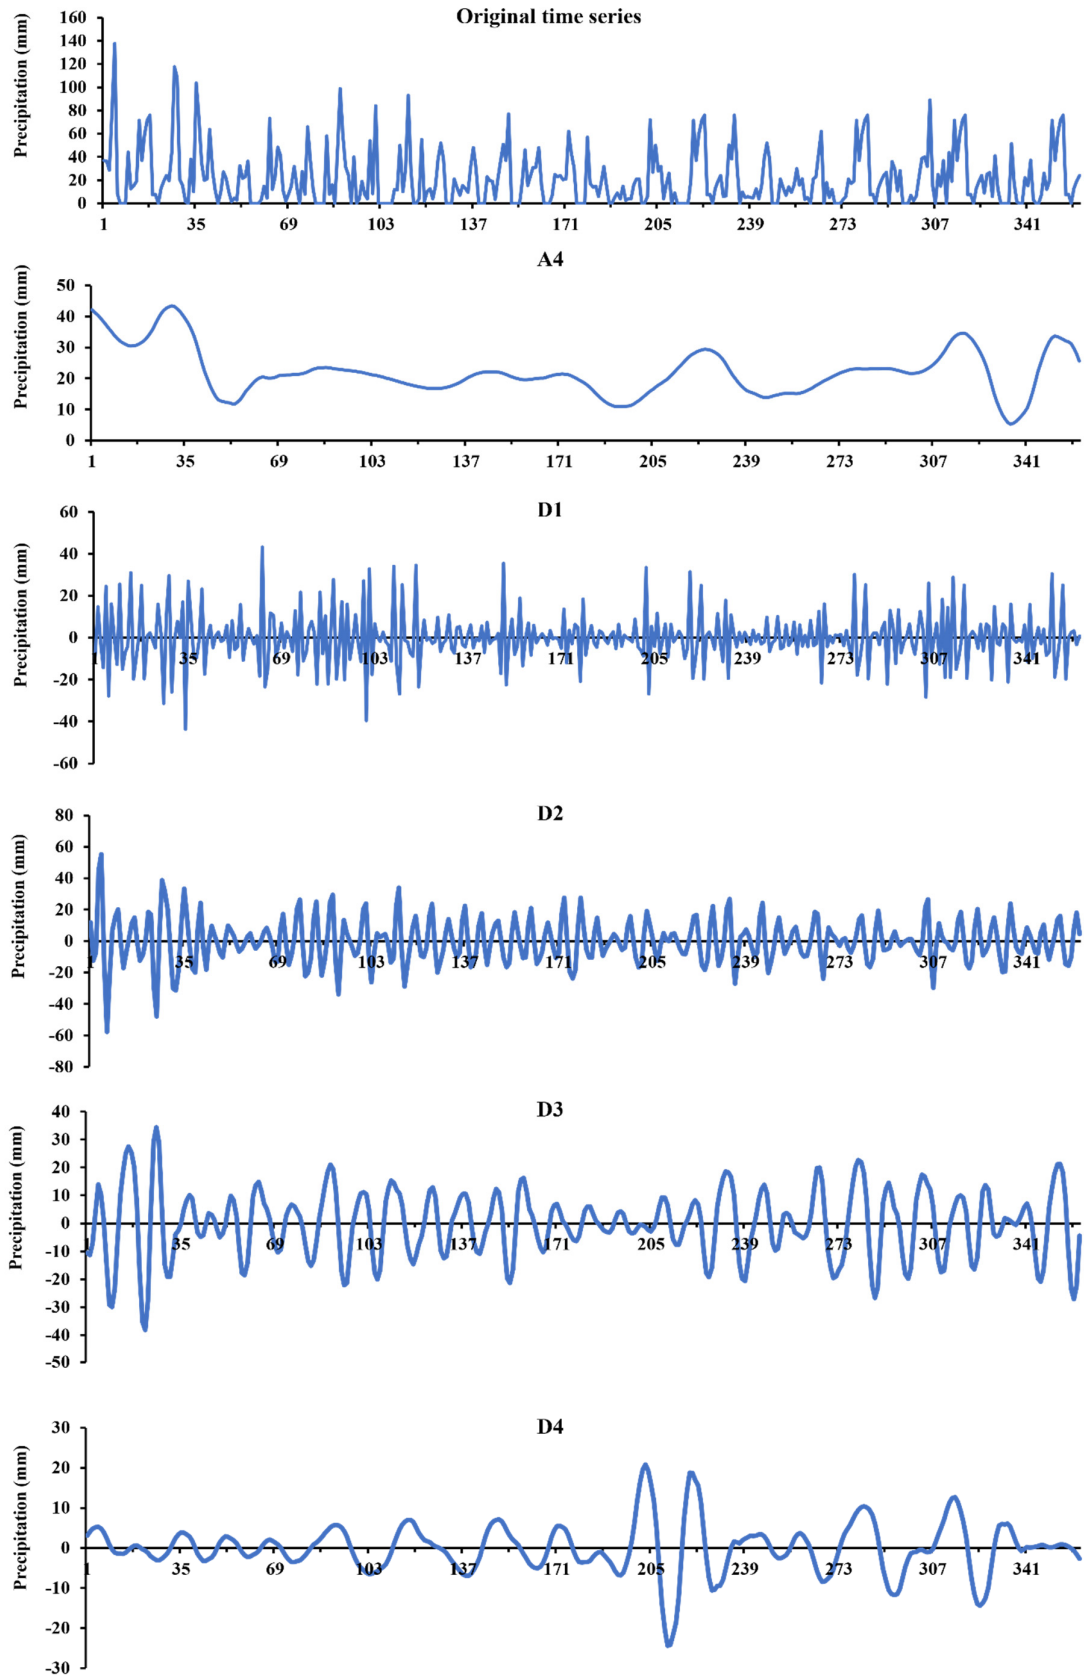

**Figure S1.** The approximation (A4) and detail (D1-D4) components of the monthly precipitation time series in the AC watershed.

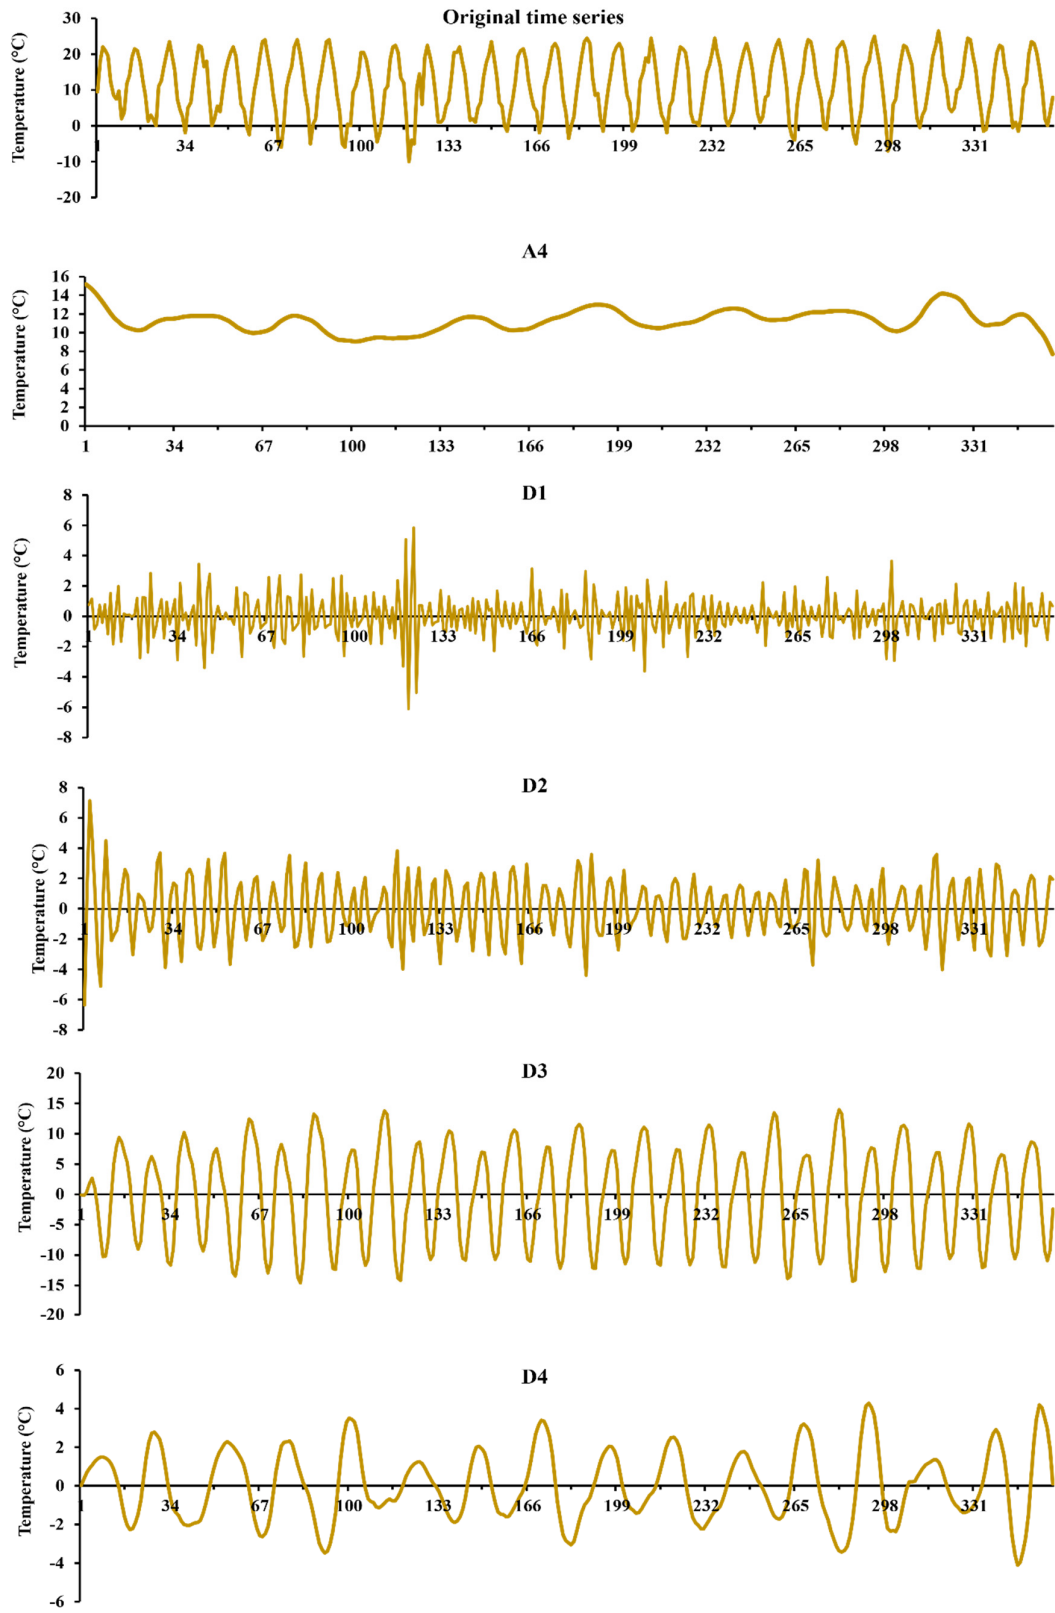

**Figure S2.** The approximation (A4) and detail (D1-D4) components of the monthly temperature time series in the AC watershed.
